# Supplementary material
Source: publisher site journal article supplement (https://www.dovepress.com/article/432198)
Supplement: Supplementary file 1 [file get_supplementary_file.php]

# Supplementary Figure 1

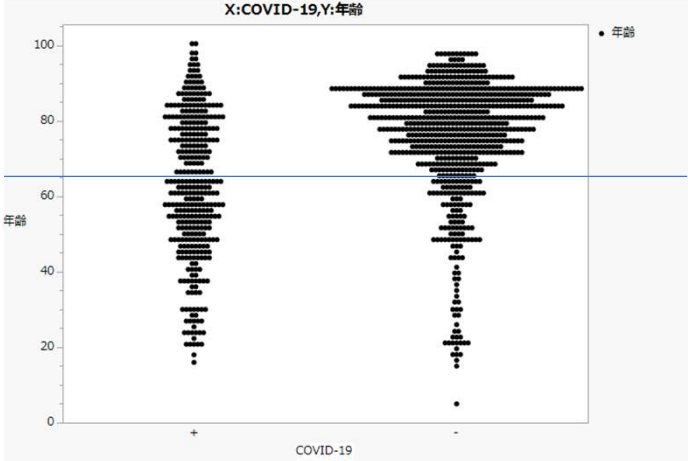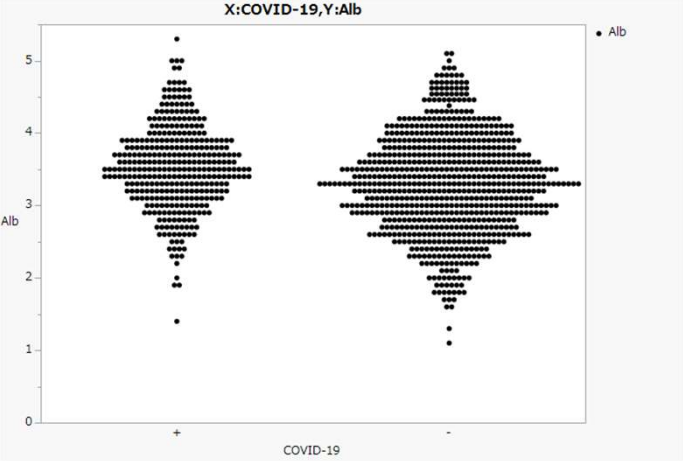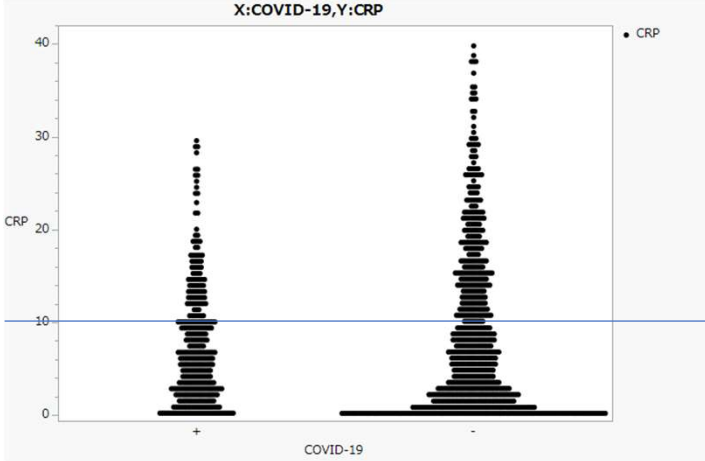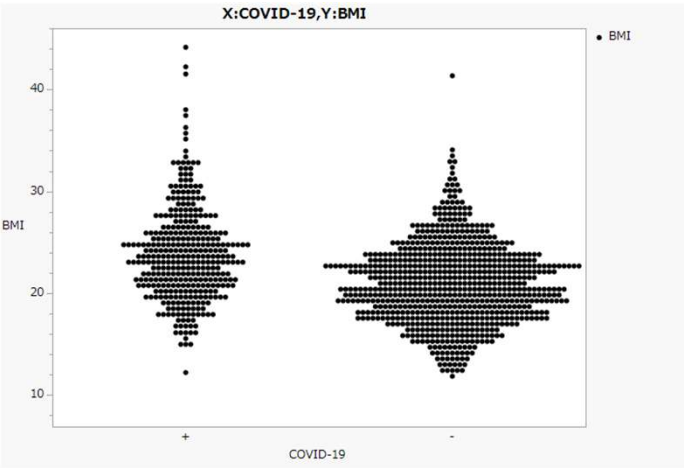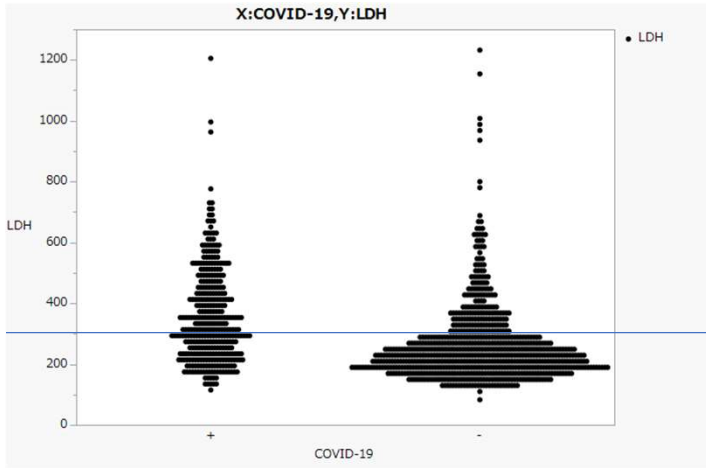

N = 1087

### **Figure legend**

Supplementary Figure 1: Distribution chart of clinical factors. Significant bias of the distribution chart for age, LDH, and CRP, but not for albumin and BMI. Thresholds were set for age, LDH and CRP.

LDH, lactate dehydrogenase; CRP, C-reactive protein; BMI, body mass index.

Supplementary Table 1

Malignancies

|                           |     |
|---------------------------|-----|
| Lung cancer               | 63* |
| Gastric cancer            | 39* |
| Colorectal cancer         | 33* |
| Prostatic cancer          | 32* |
| Breast cancer             | 26* |
| Urological cancer         | 15* |
| Head and neck cancer      | 14* |
| Gynecological cancer      | 13* |
| Pancreatic cancer         | 13* |
| Lymphoma                  | 12* |
| Leukemia                  | 10* |
| Hepatocellular cancer     | 9   |
| Kidney cancer             | 9   |
| Myelodysplastic syndrome  | 6   |
| Esophageal cancer         | 6*  |
| Biliary cancer            | 4   |
| Cancer of unknown primary | 1   |
| Others                    | 10  |
| Total                     | 315 |

\* duplication

Supplementary

Table 2

Autoimmune diseases

---

|                                                            |     |
|------------------------------------------------------------|-----|
| Rheumatoid arthritis                                       | 27* |
| Scleroderma                                                | 4*  |
| Granulomatosis with polyangiitis                           | 4*  |
| Polymyalgia rheumatica                                     | 4   |
| Anti-neutrophil cytoplasmic antibody associated vasculitis | 4   |
| Polymyositis/dermatomyositis complex                       | 3   |
| Behcet disease                                             | 2   |
| Sjögren's syndrome                                         | 2   |
| IgG4-related disease                                       | 2   |
| Mixed connective-tissue disease                            | 2   |
| Adult Still's disease                                      | 2   |
| Systemic lupus erythematosus                               | 1   |
| Total                                                      | 56  |

---

\* duplication
